# Supplementary material for: Upfront fecal microbiota transplantation for the management of immune checkpoint inhibitor mediated diarrhea and colitis
Source: Research Square preprint supplement (doi:10.21203/rs.3.rs-5455153/v1), 2025-01-13
Supplement: Supplementary file 1 [file 2e6991485dd867f509311d68.docx]

| Supplementary table 1: Recipient and donor information for fecal microbiota transplantation, n=13 | | | | | | | | | | | | |
| --- | --- | --- | --- | --- | --- | --- | --- | --- | --- | --- | --- | --- |
|  |  |  | Stool samples | | | Blood samples | Colon biopsy samples | | | | FMT response |
| Recipient ID | FMT # | Donor ID/ Lot # | Baseline | 2 wk | 4 wk | Baseline | Baseline | 4 wk | 8 wk | 12 wk |  |
| 1 | FMT 1 | A11 | X | X | X | X | X | X | X |  | Remission |
| 2 | FMT 1 | B1 | X |  |  | X | X |  |  |  | No response |
| 3 | FMT 1 | C1 | X | X | X | X | X |  |  |  | Remission |
| 4 | FMT 1 | C2 | X | X | X | X | X | X |  |  | Remission |
| 5 | FMT 1 | C2 |  | X |  | X | X | X |  |  | No response |
|  | FMT 2 | D1 | X | X |  | X | X | X |  |  | No response |
| 6 | FMT 1 | D2 | X | X | X | X | X |  |  |  | Remission |
| 7 | FMT 1 | C3 |  | X | X | X | X | X |  |  | Remission |
| 8 | FMT 1 | C3 | X | X | X | X | X |  |  |  | Remission |
| 9 | FMT 1 | D3 |  |  |  | X | X |  |  |  | Remission |
| 10 | FMT 1 | D4 |  |  |  |  | X |  | X |  | Remission |
| 11 | FMT 1 | C4 | X | X | X | X | X |  |  |  | Remission |
| 12 | FMT 1 | C5 | X | X | X | X | X |  | X |  | No response |
|  | FMT 2 | E1 | X | X |  | X | X |  |  | X | No response |
| 13 | FMT 1 | C4 | X | X | X |  | X |  |  |  | Remission |
| Abbreviations: fecal microbiota transplantation - FMT | | | | | | | | | | | | |
| ¹ Each letter represents a unique donor; the numbers following indicate differing times at which donor samples were collected. | | | | | | | | | | | | |
